# Supplementary material for: A systematic review and meta-analysis of victimisation and mental health prevalence among LGBTQ+ young people with experiences of self-harm and suicide
Source: PubMed Central journal article supplement (PMC7822285; doi:10.1371/journal.pone.0245268), 2021-01-22
Supplement: pone.0245268.s012.pdf [file pone.0245268.s012.pdf]

## NOS Case Control

### Selection

- 1) Is the case definition adequate:
  - a) Yes, with independent validation. \*
  - b) Yes, e.g. self-reports.
  - c) No description.
  
- 2) Representativeness of the cases:
  - a) Consecutive or obviously representative series of cases. \*
  - b) Potential for selection biases or not stated.
  
- 3) Selection of Controls:
  - a) Community controls. \*
  - b) Hospital controls.
  - c) No description.
  
- 4) Definition of Controls:
  - a) No history of suicide/self-harm. \*
  - b) No description of source.

### Comparability

- 1) Comparability of cases and controls on the basis of the design or analysis:
  - a) Study controls for LGBTQ status. \*
  - b) Study controls for LGBTQ and self-harm/suicide. \*\*

### Exposure

- 1) Ascertainment of exposure:
  - a) Secure record (e.g. surgical records). \*
  - b) Structured interview where blind to case/control status. \*
  - c) Self-report.
  - d) No description.
  
- 2) Same method of ascertainment for cases and controls:
  - a) Yes. \*
  - b) No.
  
- 3) Non-Response rate:
  - a) Same rate for both groups. \*
  - b) Non respondents described.
  - c) Rate different and no designation.

## NOS Cohort

### Selection

#### 1) Representativeness of the exposed cohort:

- a) Truly representative of the average in target population (all subjects or random sampling). \*
- b) Somewhat representative of the average in the target population (non-random sampling). \*
- c) Selected group of users.
- d) No description.

#### 2) Selection of the non-exposed cohort:

- a) Drawn from the same community as the exposed cohort. \*
- b) Drawn from a different source.
- c) No description.

#### 3) Ascertainment of exposure:

- a) Secure record (e.g. surgical records). \*
- b) Structured interview. \*
- c) Written self-report.
- d) No description.

#### 4) Demonstration that outcome of interest was not present at start of study:

- a) Yes. \*
- b) No.

### Comparability

#### 1) Comparability of cohorts on the basis of the design or analysis:

- a) Study controls for LGBTQ status. \*
- b) Study controls for LGBTQ and self-harm/suicide. \*\*

### Outcome

#### 1) Assessment of outcome:

- a) Independent blind assessment. \*
- b) Record linkage. \*
- c) Self-report.
- d) No description.

#### 2) Was follow-up long enough for outcomes to occur:

- a) Yes e.g. 6 months. \*
- b) No.

#### 3) Adequacy of follow up of cohorts:

- a) Complete follow up - all subjects accounted for. \*
- b) Subjects lost to follow up but rate given (description given). \*
- c) Subjects lost to follow up (no description given).
- d) No description at all.

## NOS Cross Sectional

### 1) Representativeness of the sample:

- a) Truly representative of the average in the target population. (all subjects or random sampling) \*
- b) Somewhat representative of the average in the target population. (non-random sampling) \*
- c) Selected group of users.
- d) No description of the sampling strategy.

### 2) Sample size:

- a) Justified and satisfactory. \*
- b) Not justified.

### 3) Non-respondents:

- a) Comparability between respondents and non-respondents characteristics is established, and the response rate is satisfactory. \*
- b) The response rate is unsatisfactory, or the comparability between respondents and non-respondents is unsatisfactory.
- c) No description of the response rate or the characteristics of the responders and the non-responders.

### 4) Ascertainment of the exposure:

- a) Validated measurement tool. \*\*
- b) Non-validated measurement tool, but the tool is available or described. \*
- c) No description of the measurement tool.

### **Comparability:**

1) The subjects in different outcome groups are comparable, based on the study design or analysis. Confounding factors are controlled.

- a) study controls for LGBTQ status \*
- b) study controls for LGBTQ and self-harm/suicide \*\*

### **Outcome:**

#### 1) Assessment of the outcome:

- a) Independent blind assessment. \*\*
- b) Record linkage. \*\*
- c) Self report. \*
- d) No description.

#### 2) Statistical test:

- a) The statistical test used to analyze the data is clearly described and appropriate, and the measurement of the association is presented, including confidence intervals and the probability level (p value). \*
- b) The statistical test is not appropriate, not described or incomplete.
